# Supplementary material for: Arsenic sensor development based on modification with (E)-N′-(2-nitrobenzylidine)-benzenesulfonohydrazide: a real sample analysis
Source: Royal Society of Chemistry journal article supplement (doi:10.1039/c9nj01567a), 2019-01-01
Supplement: c9nj01567a1.pdf [file c9nj01567a1.pdf]

**Arsenic sensor development based on modified with (*E*)-*N'*-(2-Nitrobenzylidene)-benzenesulfonylhydrazide: A real sample analysis†**

Mohammed M. Rahman\*<sup>ab</sup>, Mohammad Musarraff Hussain\*<sup>abc</sup>, Muhammad N. Arshad<sup>ab</sup>, Md. Rabiul Awual<sup>b</sup>, and Abdullah M. Asiri<sup>ab</sup>

<sup>a</sup>Chemistry Department, Faculty of Science, King Abdulaziz University, Jeddah 21589, P.O. Box 80203, Saudi Arabia.

<sup>b</sup>Center of Excellence for Advanced Materials Research, King Abdulaziz University, Jeddah 21589, P.O. Box 80203, Saudi Arabia.

<sup>c</sup>Department of Pharmacy, Faculty of Life and Earth Sciences, Jagannath University, Dhaka-1100, Bangladesh

**Electronic supplementary materials (ESM)**

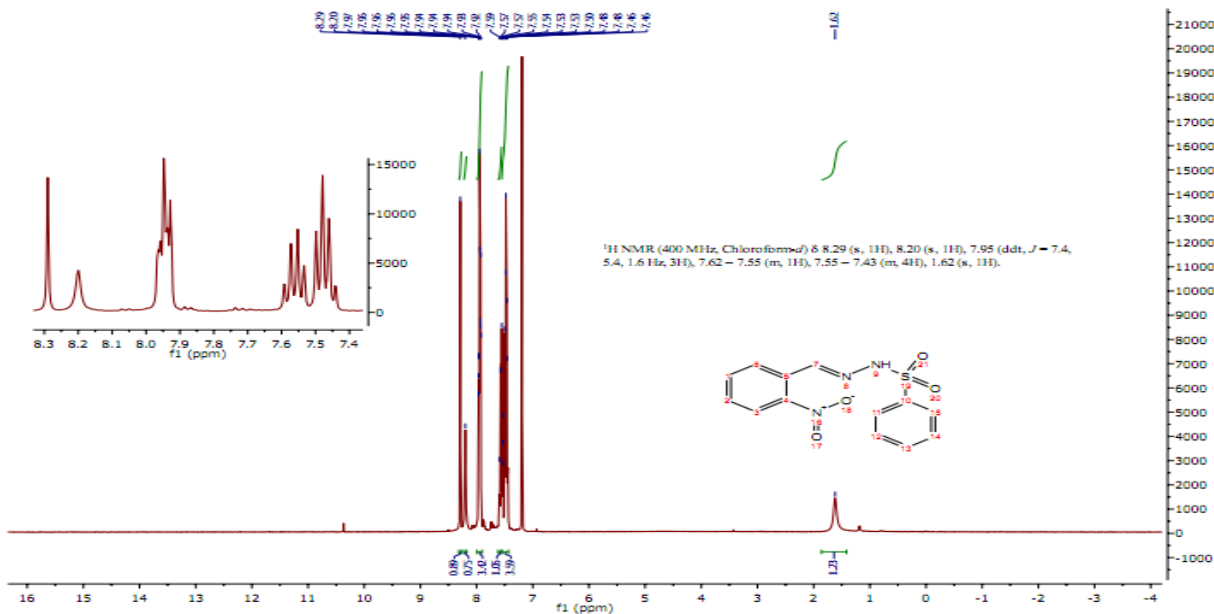

**Fig. S1.** <sup>1</sup>H-NMR of the compound NBBSH

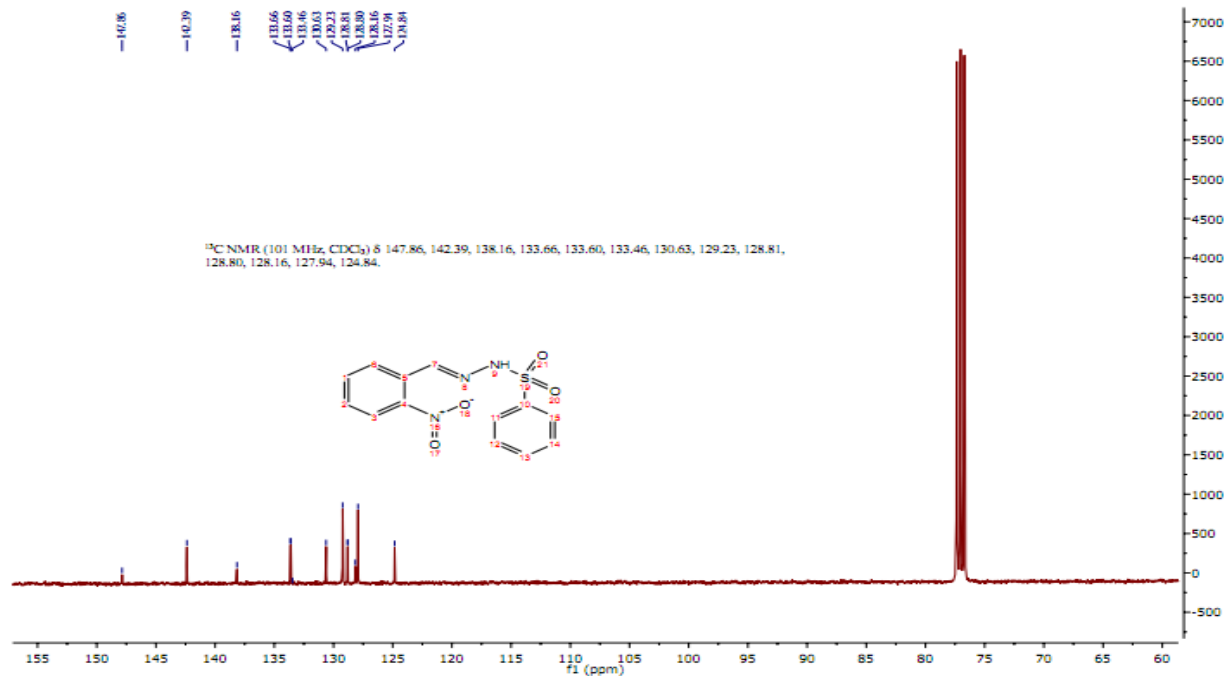

**Fig. S2.**  $^{13}\text{C}$ -NMR of NBBSH molecule

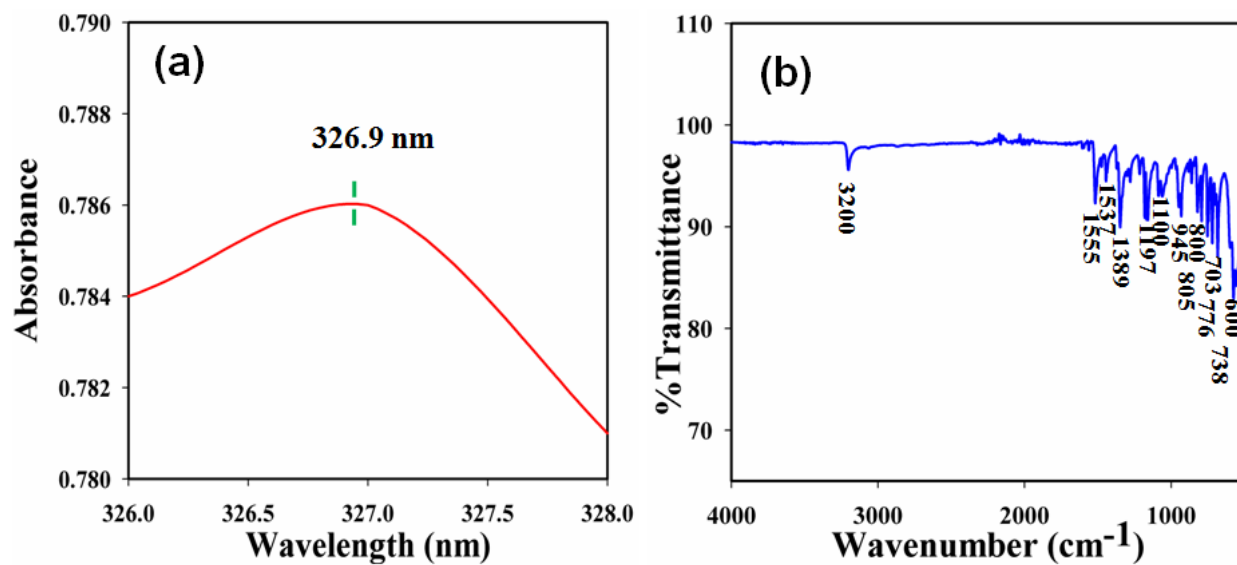

**Fig. S3.** (a) UV spectrum and (b) FTIR of compound NBBSH

**Table S1:** Crystal data and structure refinement for NBBSH

| <b>Parameters</b>                  | <b>NBBSH</b>                                                    |
|------------------------------------|-----------------------------------------------------------------|
| Empirical formula                  | C <sub>13</sub> H <sub>11</sub> N <sub>3</sub> O <sub>4</sub> S |
| Formula weight                     | 305.31                                                          |
| Temperature/K                      | 293(2)                                                          |
| Crystal system                     | monoclinic                                                      |
| Space group                        | P2 <sub>1</sub> /n                                              |
| a/Å                                | 5.5720(3)                                                       |
| b/Å                                | 23.2361(9)                                                      |
| c/Å                                | 10.6070(4)                                                      |
| α/°                                | 90                                                              |
| β/°                                | 98.807(4)                                                       |
| γ/°                                | 90                                                              |
| Volume/Å <sup>3</sup>              | 1357.11(10)                                                     |
| Z                                  | 4                                                               |
| ρ <sub>calc</sub> /cm <sup>3</sup> | 1.494                                                           |
| μ/mm <sup>-1</sup>                 | 0.259                                                           |
| F(000)                             | 632.0                                                           |
| Crystal size/mm <sup>3</sup>       | 0.49 × 0.24 × 0.07                                              |
| Radiation                          | MoKα (λ = 0.7107)                                               |
| 2θ range for data collection/°     | 6.54 to 58.604                                                  |
| Index ranges                       | -5 ≤ h ≤ 7, -29 ≤ k ≤ 31, -13 ≤ l ≤ 14                          |
| Reflections collected              | 6309                                                            |

---

|                                                |                                                                  |
|------------------------------------------------|------------------------------------------------------------------|
| Independent reflections                        | 3211 [ $R_{\text{int}} = 0.0217$ , $R_{\text{sigma}} = 0.0389$ ] |
| Data/restraints/parameters                     | 3211/0/193                                                       |
| Goodness-of-fit on $F^2$                       | 1.024                                                            |
| Final R indexes [ $I \geq 2\sigma(I)$ ]        | $R_1 = 0.0441$ , $wR_2 = 0.0973$                                 |
| Final R indexes [all data]                     | $R_1 = 0.0665$ , $wR_2 = 0.1106$                                 |
| Largest diff. peak/hole / $e \text{ \AA}^{-3}$ | 0.28/-0.37                                                       |

---

**Table S2:** Bond Lengths for NBBSH

| Atom | Atom | Length/ $\text{\AA}$ | Atom | Atom | Length/ $\text{\AA}$ |
|------|------|----------------------|------|------|----------------------|
| C1   | C2   | 1.399(3)             | C8   | S1   | 1.7573(19)           |
| C1   | C6   | 1.393(3)             | C9   | C10  | 1.384(3)             |
| C1   | C7   | 1.468(3)             | C10  | C11  | 1.350(4)             |
| C2   | C3   | 1.391(3)             | C11  | C12  | 1.361(4)             |
| C2   | N1   | 1.465(3)             | C12  | C13  | 1.378(3)             |
| C3   | C4   | 1.375(3)             | N1   | O1   | 1.221(2)             |
| C4   | C5   | 1.379(3)             | N1   | O2   | 1.220(2)             |
| C5   | C6   | 1.376(3)             | N2   | N3   | 1.382(2)             |
| C7   | N2   | 1.274(2)             | N3   | S1   | 1.6336(17)           |
| C8   | C9   | 1.375(3)             | O3   | S1   | 1.4234(15)           |
| C8   | C13  | 1.371(3)             | O4   | S1   | 1.4304(14)           |

---

**Table S3:** Bond Angles for NBBSH

| Atom | Atom | Atom | Angle/°    | Atom | Atom | Atom | Angle/°    |
|------|------|------|------------|------|------|------|------------|
| C2   | C1   | C7   | 124.84(17) | C11  | C10  | C9   | 120.6(2)   |
| C6   | C1   | C2   | 115.81(17) | C10  | C11  | C12  | 120.2(2)   |
| C6   | C1   | C7   | 119.27(17) | C11  | C12  | C13  | 120.5(3)   |
| C1   | C2   | N1   | 121.92(17) | C8   | C13  | C12  | 119.3(2)   |
| C3   | C2   | C1   | 122.16(18) | O1   | N1   | C2   | 117.69(19) |
| C3   | C2   | N1   | 115.92(18) | O2   | N1   | C2   | 119.72(18) |
| C4   | C3   | C2   | 119.7(2)   | O2   | N1   | O1   | 122.58(19) |
| C3   | C4   | C5   | 119.6(2)   | C7   | N2   | N3   | 114.83(16) |
| C6   | C5   | C4   | 120.1(2)   | N2   | N3   | S1   | 117.60(13) |
| C5   | C6   | C1   | 122.6(2)   | N3   | S1   | C8   | 107.53(9)  |
| N2   | C7   | C1   | 118.81(17) | O3   | S1   | C8   | 108.57(9)  |
| C9   | C8   | S1   | 120.34(17) | O3   | S1   | N3   | 108.32(9)  |
| C13  | C8   | C9   | 120.29(19) | O3   | S1   | O4   | 120.37(9)  |
| C13  | C8   | S1   | 119.36(16) | O4   | S1   | C8   | 108.04(9)  |
| C8   | C9   | C10  | 119.1(2)   | O4   | S1   | N3   | 103.32(9)  |

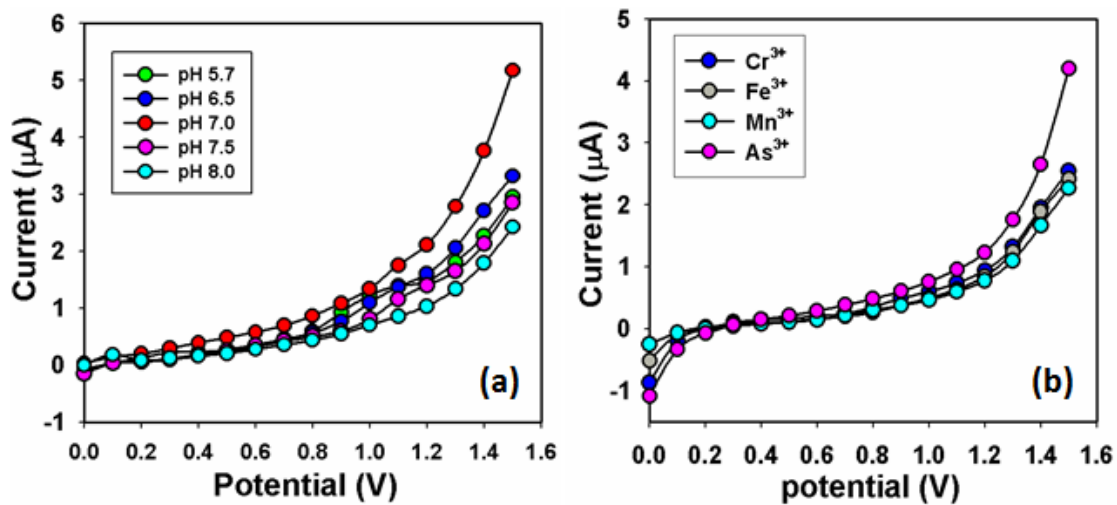

Fig. S4. (a) Optimization of pH and (b) Interference study
